# Supplementary material
Source: PubMed Central journal article supplement (PMC5844832)

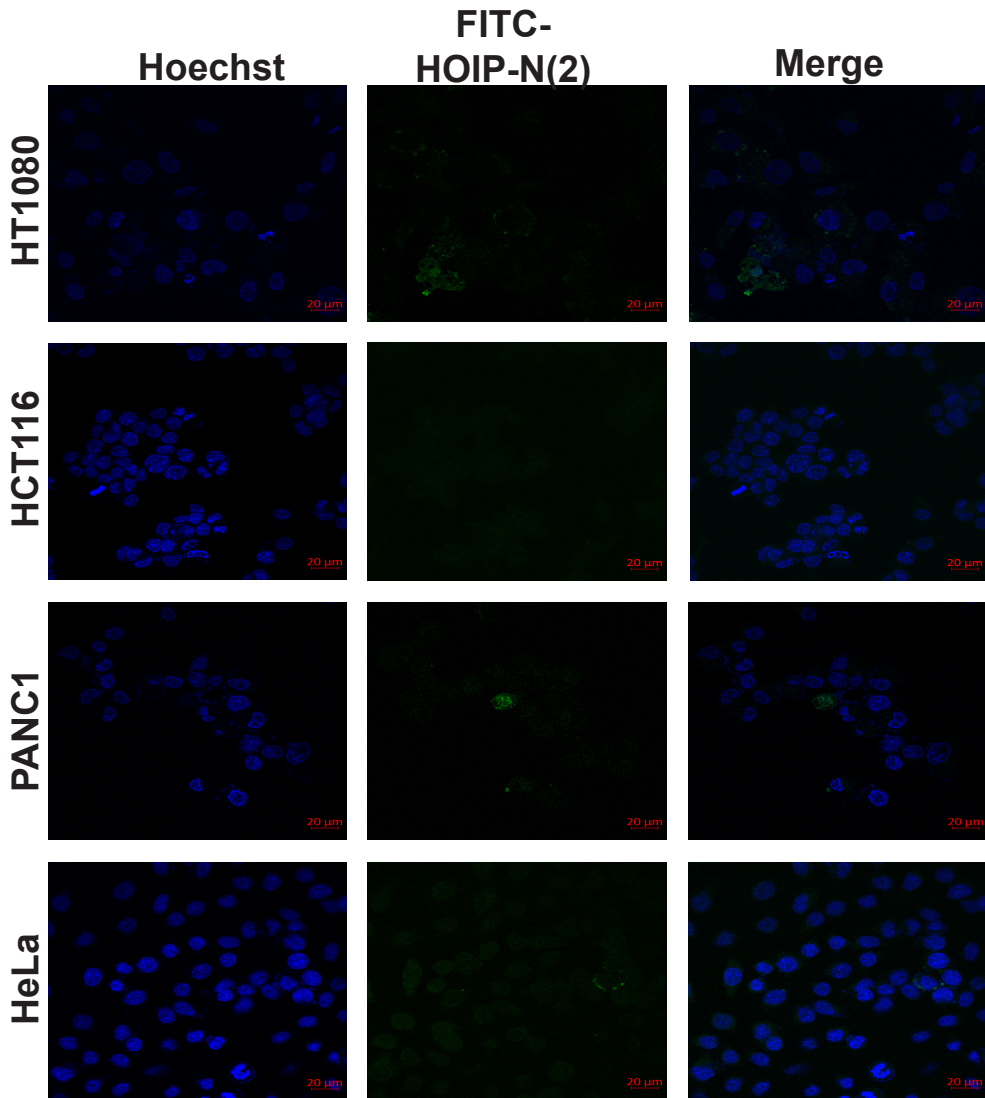

Supplement: NIHMS925269-supplement-5.pdf [file NIHMS925269-supplement-5.pdf]

# HeLa Cytotoxicity

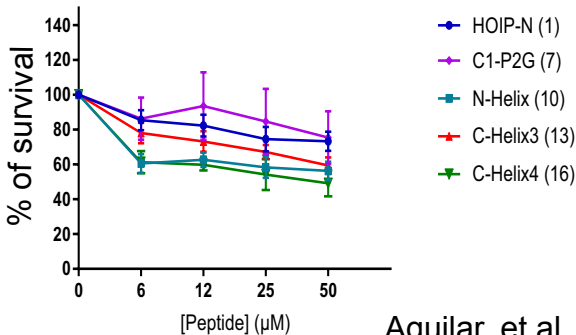

Aguilar, et al.  
Supp Figure 8.

Supplement: NIHMS925269-supplement-8.pdf [file NIHMS925269-supplement-8.pdf]
